# Supplementary material for: Mechanism by Which Backfill Body Reduces Amount of Energy Released in Deep Coal Mining
Source: Hindawi journal article supplement (doi:10.1155/2019/8253269), 2019-01-01
Supplement: f1 [file 8253269.f1.pdf]

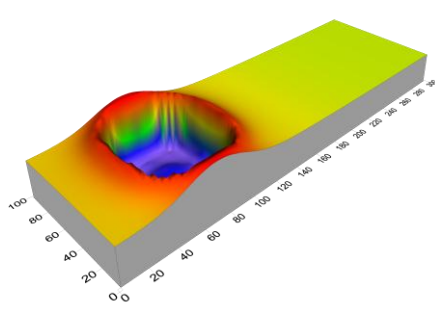

a. working face advanced to 48m

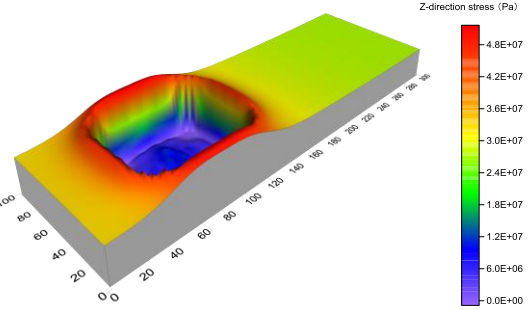

b. working fae advanced to 72m

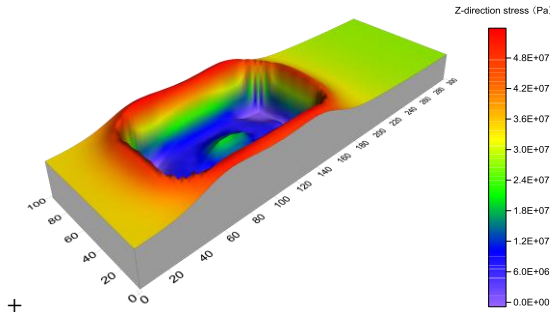

c. working face advanced to 112m

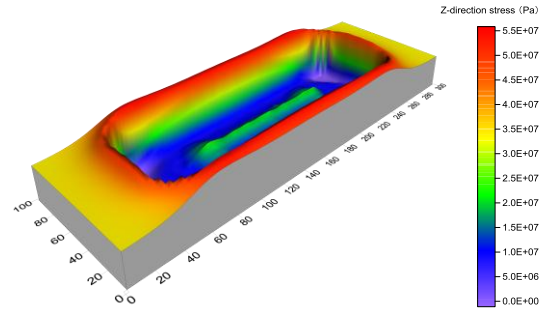

d. working fae advanced to 200m

**Figure S1 Distribution of z-direction stress at different advancing distanes when using caving mining**

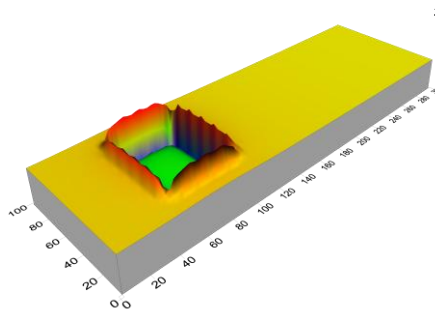

a. working face advanced to 48m

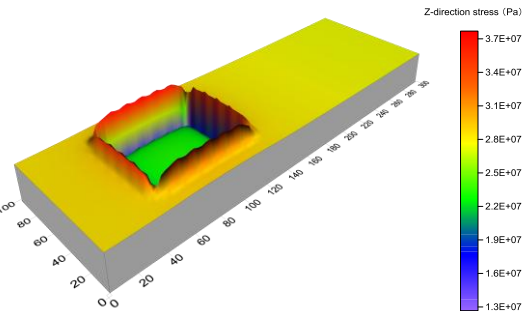

b. working fae advanced to 72m

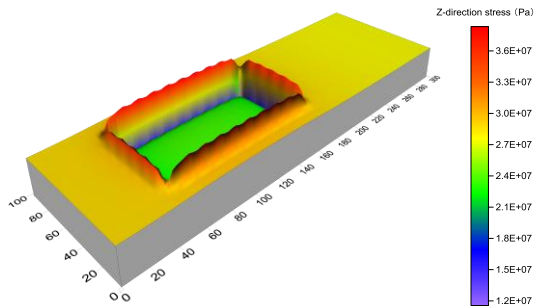

c. working face advanced to 112m

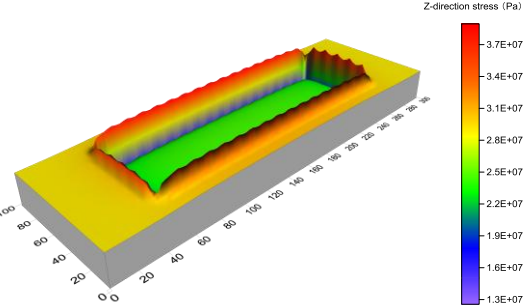

d. working fae advanced to 200m

**Figure S2 Distribution of stress at different advancing distanes when using backfilling mining**

**Table S1 Physical and mechanical parameters of rock formations in the model**

| <b>lithology</b> | <b>thickness<br/>/m</b> | <b>elastic<br/>module/GPa</b> | <b>poison<br/>ratio</b> | <b>tensile<br/>strength<br/>/MPa</b> | <b>cohesion<br/>/MPa</b> | <b>internal<br/>friction<br/>angle<br/>/°</b> | <b>density<br/>/kN•m<sup>-3</sup></b> |
|------------------|-------------------------|-------------------------------|-------------------------|--------------------------------------|--------------------------|-----------------------------------------------|---------------------------------------|
| mudstone         | 10                      | 24                            | 0.27                    | 2.5                                  | 1.8                      | 35                                            | 18.0                                  |
| medium sandstone | 14                      | 20                            | 0.21                    | 8.0                                  | 2.5                      | 31                                            | 24.0                                  |
| fine sandstone   | 12                      | 28                            | 0.26                    | 7.0                                  | 2.3                      | 34                                            | 23.0                                  |
| mudstone         | 12                      | 25                            | 0.25                    | 1.8                                  | 2.0                      | 32                                            | 20.0                                  |
| siltstone        | 18                      | 25                            | 0.33                    | 10.0                                 | 2.0                      | 33                                            | 24.0                                  |
| mudstone         | 8                       | 23                            | 0.27                    | 2.3                                  | 1.2                      | 32                                            | 21.0                                  |
| fine sandstone   | 8                       | 28                            | 0.28                    | 3.8                                  | 1.6                      | 30                                            | 23.0                                  |
| mudstone         | 10                      | 25                            | 0.3                     | 2.0                                  | 2.6                      | 29                                            | 20.0                                  |
| sandy mudstone   | 2                       | 26                            | 0.29                    | 2.5                                  | 1.6                      | 28                                            | 22                                    |
| mudstone         | 3                       | 24                            | 0.3                     | 2.4                                  | 1.3                      | 32                                            | 18.0                                  |
| medium sandstone | 9                       | 21                            | 0.23                    | 8.3                                  | 1.6                      | 31                                            | 24                                    |
| mudstone         | 2                       | 26                            | 0.25                    | 2.0                                  | 1.9                      | 31                                            | 16.0                                  |
| medium sandstone | 2                       | 18                            | 0.22                    | 7.5                                  | 1.4                      | 30                                            | 25                                    |
| coal             | 4                       | 3.5                           | 0.27                    | 1.01                                 | 0.6                      | 24                                            | 14.0                                  |
| mudstone         | 1                       | 23                            | 0.27                    | 2.3                                  | 1.2                      | 32                                            | 19.0                                  |
| fine sandstone   | 3                       | 24                            | 0.26                    | 5.5                                  | 2.9                      | 31                                            | 24.5                                  |
